# Supplementary material for: Effects of advance regeneration and germinated seedlings on forest recovery after clearcutting of Chamaecyparis obtusa plantations in Southern Kyushu, Southwestern Japan
Source: Springer Nature journal article supplement (doi:10.1007/s11355-021-00485-4), 2021-10-23
Supplement: MOESM1 [file 19788640]

Table S1. Individual density and average tree height of advance regeneration group and seedlings for each species in the (a) understory-intact plot and (b) understory-cleared plot. S-AR, R-AR and SE denote surviving advance regenerations, resprouted advance regenerations and seedlings, respectively.

(a) Understory-intact plot

| Species groups / Species        | Seed dispersal types <sup>a</sup> | Individual density (no./ha) |      |      |      |       |      | Average tree height (m) |      |      |      |      |      |     |
|---------------------------------|-----------------------------------|-----------------------------|------|------|------|-------|------|-------------------------|------|------|------|------|------|-----|
|                                 |                                   | S-AR                        |      | R-AR |      | SE    |      | S-AR                    |      | R-AR |      | SE   |      |     |
|                                 |                                   | 2006                        | 2017 | 2006 | 2017 | 2006  | 2017 | 2006                    | 2017 | 2006 | 2017 | 2006 | 2017 |     |
| <b>Pioneer</b>                  |                                   |                             |      |      |      |       |      |                         |      |      |      |      |      |     |
| <i>Aralia elata</i>             | F                                 | 0                           | 0    | 0    | 0    | 632   | 0    | 0                       | 0    | 0    | 0    | 0    | 0.1  | 0   |
| <i>Boehmeria spicata</i>        | F                                 | 0                           | 0    | 0    | 0    | 95    | 0    | 0                       | 0    | 0    | 0    | 0    | 0.2  | 0   |
| <i>Clerodendrum trichotomum</i> | F                                 | 0                           | 0    | 0    | 0    | 516   | 32   | 0                       | 0    | 0    | 0    | 0    | 0.4  | 2.1 |
| <i>Evodia meliaefolia</i>       | F                                 | 0                           | 0    | 0    | 0    | 21    | 0    | 0                       | 0    | 0    | 0    | 0    | 0.2  | 0   |
| <i>Fagara ailanthoides</i>      | F                                 | 0                           | 0    | 0    | 0    | 7389  | 189  | 0                       | 0    | 0    | 0    | 0    | 0.3  | 6.6 |
| <i>Fagara manchurica</i>        | F                                 | 0                           | 0    | 0    | 0    | 105   | 11   | 0                       | 0    | 0    | 0    | 0    | 0.3  | 1.7 |
| <i>Idesia polycarpa</i>         | F                                 | 0                           | 0    | 0    | 0    | 5611  | 158  | 0                       | 0    | 0    | 0    | 0    | 0.2  | 6.4 |
| <i>Mallotus japonicus</i>       | F                                 | 0                           | 0    | 0    | 0    | 8905  | 537  | 0                       | 0    | 0    | 0    | 0    | 0.2  | 5.6 |
| <i>Rhus javanica</i>            | F                                 | 0                           | 0    | 0    | 0    | 116   | 126  | 0                       | 0    | 0    | 0    | 0    | 0.1  | 4.7 |
| <i>Rhus succedanea</i>          | F                                 | 0                           | 0    | 0    | 0    | 0     | 11   | 0                       | 0    | 0    | 0    | 0    | 0    | 8.0 |
| <i>Rhus sylvestris</i>          | F                                 | 0                           | 0    | 0    | 0    | 21    | 0    | 0                       | 0    | 0    | 0    | 0    | 0.7  | 0   |
| <i>Rhus trichocarpa</i>         | F                                 | 0                           | 0    | 0    | 0    | 11    | 11   | 0                       | 0    | 0    | 0    | 0    | 0.2  | 1.0 |
| <i>Rosa multiflora</i>          | F                                 | 0                           | 0    | 0    | 0    | 21    | 0    | 0                       | 0    | 0    | 0    | 0    | 0.3  | 0   |
| <i>Rubus crataegifolius</i>     | F                                 | 0                           | 0    | 0    | 0    | 1589  | 0    | 0                       | 0    | 0    | 0    | 0    | 0.2  | 0   |
| <i>Rubus palmatus</i>           | F                                 | 0                           | 0    | 0    | 0    | 189   | 0    | 0                       | 0    | 0    | 0    | 0    | 0.2  | 0   |
| <i>Rubus sumatranus</i>         | F                                 | 0                           | 0    | 0    | 0    | 568   | 0    | 0                       | 0    | 0    | 0    | 0    | 0.3  | 0   |
| <i>Sambucus racemosa</i>        | F                                 | 0                           | 0    | 0    | 0    | 21    | 0    | 0                       | 0    | 0    | 0    | 0    | 0.2  | 0   |
| <i>Stachyurus praecox</i>       | F                                 | 11                          | 11   | 0    | 0    | 779   | 295  | 0.4                     | 4.5  | 0    | 0    | 0    | 0.2  | 2.9 |
| <i>Villebrunea frutescens</i>   | F                                 | 0                           | 0    | 0    | 0    | 0     | 221  | 0                       | 0    | 0    | 0    | 0    | 0.0  | 1.1 |
| <i>Albizia julibrissin</i>      | W                                 | 0                           | 0    | 0    | 0    | 53    | 0    | 0                       | 0    | 0    | 0    | 0    | 0.2  | 0   |
| Total                           |                                   | 11                          | 11   | 0    | 0    | 26642 | 1589 | 0.4                     | 4.5  | 0    | 0    | 0    | 0.2  | 4.5 |
| <b>Coppice shrub</b>            |                                   |                             |      |      |      |       |      |                         |      |      |      |      |      |     |
| <i>Antidesma japonicum</i>      | F                                 | 11                          | 11   | 11   | 11   | 63    | 179  | 4.3                     | 4.7  | 1.4  | 2.7  | 0.2  | 2.0  |     |
| <i>Callicarpa japonica</i>      | F                                 | 11                          | 11   | 0    | 0    | 526   | 379  | 1.8                     | 4.5  | 0    | 0    | 0.2  | 2.0  |     |
| <i>Callicarpa mollis</i>        | F                                 | 11                          | 11   | 21   | 21   | 1979  | 663  | 1.5                     | 1.8  | 0.7  | 1.6  | 0.2  | 1.9  |     |
| <i>Cudrania cochinchinensis</i> | F                                 | 0                           | 0    | 0    | 0    | 21    | 0    | 0                       | 0    | 0    | 0    | 0.1  | 0    |     |
| <i>Glochidion obovatum</i>      | F                                 | 0                           | 0    | 0    | 0    | 11    | 0    | 0                       | 0    | 0    | 0    | 0.1  | 0    |     |
| <i>Hebdingia japonica</i>       | F                                 | 0                           | 0    | 0    | 0    | 137   | 158  | 0                       | 0    | 0    | 0    | 0.2  | 1.4  |     |
| <i>Ilex crenata</i>             | F                                 | 0                           | 0    | 0    | 0    | 11    | 0    | 0                       | 0    | 0    | 0    | 0.1  | 0    |     |
| <i>Phyllanthus flexuosus</i>    | F                                 | 0                           | 0    | 0    | 0    | 137   | 63   | 0                       | 0    | 0    | 0    | 0.2  | 2.0  |     |
| <i>Prenna microphylla</i>       | F                                 | 21                          | 11   | 11   | 0    | 558   | 126  | 0.6                     | 4.8  | 1.4  | 0    | 0.2  | 2.2  |     |
| <i>Viburnum dilatatum</i>       | F                                 | 0                           | 0    | 0    | 0    | 21    | 0    | 0                       | 0    | 0    | 0    | 0.3  | 0    |     |
| <i>Viburnum erosum</i>          | F                                 | 0                           | 0    | 0    | 0    | 11    | 0    | 0                       | 0    | 0    | 0    | 0.1  | 0    |     |
| <i>Xylosma congestum</i>        | F                                 | 11                          | 11   | 0    | 0    | 0     | 0    | 2.1                     | 4.5  | 0    | 0    | 0    | 0    |     |
| <i>Zanthoxylum piperitum</i>    | F                                 | 0                           | 0    | 0    | 0    | 11    | 0    | 0                       | 0    | 0    | 0    | 0.2  | 0    |     |
| Total                           |                                   | 63                          | 53   | 42   | 32   | 3484  | 1568 | 1.8                     | 4.1  | 1.1  | 2    | 0.2  | 1.9  |     |
| <b>Coppice tree</b>             |                                   |                             |      |      |      |       |      |                         |      |      |      |      |      |     |
| <i>Quercus serrata</i>          | G                                 | 0                           | 0    | 0    | 0    | 0     | 11   | 0                       | 0    | 0    | 0    | 0    | 0    | 2.2 |
| <i>Aphananthe aspera</i>        | F                                 | 0                           | 0    | 0    | 0    | 21    | 11   | 0                       | 0    | 0    | 0    | 0.1  | 0.8  |     |
| <i>Celtis sinensis</i>          | F                                 | 0                           | 0    | 0    | 0    | 32    | 0    | 0                       | 0    | 0    | 0    | 0.2  | 0    |     |
| <i>Comus controversa</i>        | F                                 | 0                           | 0    | 0    | 0    | 0     | 21   | 0                       | 0    | 0    | 0    | 0    | 0    | 5.5 |
| <i>Comus macrophylla</i>        | F                                 | 0                           | 0    | 0    | 0    | 84    | 84   | 0                       | 0    | 0    | 0    | 0.3  | 5.3  |     |
| <i>Diospyros japonica</i>       | F                                 | 0                           | 0    | 0    | 0    | 0     | 21   | 0                       | 0    | 0    | 0    | 0    | 0    | 2.6 |
| <i>Ehretia ovalifolia</i>       | F                                 | 11                          | 11   | 0    | 0    | 5147  | 84   | 18                      | 25   | 0    | 0    | 0.1  | 7.5  |     |
| <i>Euscaphis japonica</i>       | F                                 | 0                           | 0    | 0    | 0    | 0     | 84   | 0                       | 0    | 0    | 0    | 0    | 0    | 5.0 |
| <i>Morus australis</i>          | F                                 | 0                           | 0    | 0    | 0    | 0     | 42   | 0                       | 0    | 0    | 0    | 0    | 0    | 1.5 |
| <i>Prunus jamasakura</i>        | F                                 | 0                           | 0    | 0    | 0    | 0     | 126  | 0                       | 0    | 0    | 0    | 0    | 0    | 2.4 |
| <i>Styrax japonica</i>          | F                                 | 0                           | 0    | 0    | 0    | 0     | 137  | 0                       | 0    | 0    | 0    | 0    | 0    | 3.3 |
| Total                           |                                   | 11                          | 11   | 0    | 0    | 5284  | 621  | 18                      | 25   | 0    | 0    | 0.1  | 4.0  |     |



|                                                   |   |   |   |      |      |       |      |   |   |     |     |     |     |
|---------------------------------------------------|---|---|---|------|------|-------|------|---|---|-----|-----|-----|-----|
| <i>Fagara ailanthoides</i>                        | F | 0 | 0 | 0    | 0    | 8109  | 158  | 0 | 0 | 0   | 0   | 0.2 | 7.1 |
| <i>Fagara manchurica</i>                          | F | 0 | 0 | 0    | 0    | 12    | 0    | 0 | 0 | 0   | 0   | 0.2 | 0   |
| <i>Idesia polycarpa</i>                           | F | 0 | 0 | 0    | 0    | 2012  | 170  | 0 | 0 | 0   | 0   | 0.1 | 6.7 |
| <i>Mallotus japonicus</i>                         | F | 0 | 0 | 0    | 0    | 13733 | 2012 | 0 | 0 | 0   | 0   | 0.2 | 6.2 |
| <i>Rhus javanica</i>                              | F | 0 | 0 | 0    | 0    | 291   | 48   | 0 | 0 | 0   | 0   | 0.1 | 5.6 |
| <i>Rhus succedanea</i>                            | F | 0 | 0 | 0    | 0    | 24    | 0    | 0 | 0 | 0   | 0   | 0.1 | 0   |
| <i>Rhus sylvestris</i>                            | F | 0 | 0 | 0    | 0    | 388   | 0    | 0 | 0 | 0   | 0   | 0.2 | 0   |
| <i>Rubus crataegifolius</i>                       | F | 0 | 0 | 0    | 0    | 1370  | 0    | 0 | 0 | 0   | 0   | 0.2 | 0   |
| <i>Rubus palmatus</i>                             | F | 0 | 0 | 0    | 0    | 473   | 48   | 0 | 0 | 0   | 0   | 0.2 | 1.4 |
| <i>Rubus sieboldii</i>                            | F | 0 | 0 | 0    | 0    | 0     | 170  | 0 | 0 | 0   | 0   | 0   | 0.8 |
| <i>Sambucus racemosa</i>                          | F | 0 | 0 | 0    | 0    | 24    | 12   | 0 | 0 | 0   | 0   | 0.1 | 4.0 |
| <i>Stachyurus praecox</i>                         | F | 0 | 0 | 0    | 0    | 1855  | 388  | 0 | 0 | 0   | 0   | 0.2 | 4.0 |
| <i>Wikstroemia trichotoma</i>                     | F | 0 | 0 | 0    | 0    | 145   | 291  | 0 | 0 | 0   | 0   | 0.3 | 0.9 |
| <i>Albizia julibrissin</i>                        | W | 0 | 0 | 0    | 0    | 570   | 61   | 0 | 0 | 0   | 0   | 0.1 | 5.3 |
| <i>Deutzia scabra</i>                             | W | 0 | 0 | 0    | 0    | 109   | 121  | 0 | 0 | 0   | 0   | 0.2 | 1.9 |
| Total                                             |   | 0 | 0 | 0    | 0    | 31382 | 3648 | 0 | 0 | 0   | 0   | 0.2 | 5.2 |
| Coppice shrub                                     |   |   |   |      |      |       |      |   |   |     |     |     |     |
| <i>Callicarpa japonica</i>                        | F | 0 | 0 | 24   | 12   | 218   | 303  | 0 | 0 | 0.2 | 0.8 | 0.1 | 1.6 |
| <i>Callicarpa mollis</i>                          | F | 0 | 0 | 97   | 73   | 727   | 618  | 0 | 0 | 0.3 | 2.2 | 0.1 | 1.9 |
| <i>Hebvingia japonica</i>                         | F | 0 | 0 | 0    | 0    | 24    | 85   | 0 | 0 | 0   | 0   | 0.2 | 1.3 |
| <i>Phyllanthus flexuosus</i>                      | F | 0 | 0 | 0    | 0    | 73    | 73   | 0 | 0 | 0   | 0   | 0.2 | 3.1 |
| <i>Premna microphylla</i>                         | F | 0 | 0 | 36   | 24   | 24    | 36   | 0 | 0 | 0.5 | 6.1 | 0.2 | 4.7 |
| Total                                             |   | 0 | 0 | 158  | 109  | 1067  | 1115 | 0 | 0 | 0.3 | 2.9 | 0.1 | 2.0 |
| Coppice tree                                      |   |   |   |      |      |       |      |   |   |     |     |     |     |
| <i>Aphananthe aspera</i>                          | F | 0 | 0 | 0    | 0    | 12    | 12   | 0 | 0 | 0   | 0   | 0.7 | 1.9 |
| <i>Comus controversa</i>                          | F | 0 | 0 | 0    | 0    | 12    | 12   | 0 | 0 | 0   | 0   | 0.1 | 9.0 |
| <i>Comus macrophylla</i>                          | F | 0 | 0 | 0    | 0    | 121   | 121  | 0 | 0 | 0   | 0   | 0.2 | 6.5 |
| <i>Diospyros japonica</i>                         | F | 0 | 0 | 0    | 0    | 0     | 109  | 0 | 0 | 0   | 0   | 0   | 8.1 |
| <i>Ehretia ovalifolia</i>                         | F | 0 | 0 | 0    | 0    | 303   | 36   | 0 | 0 | 0   | 0   | 0.2 | 2.0 |
| <i>Euscaphis japonica</i>                         | F | 0 | 0 | 0    | 0    | 12    | 12   | 0 | 0 | 0   | 0   | 0.1 | 3.3 |
| <i>Lindera erythrocarpa</i>                       | F | 0 | 0 | 0    | 0    | 24    | 12   | 0 | 0 | 0   | 0   | 0.1 | 6.1 |
| <i>Morus australis</i>                            | F | 0 | 0 | 0    | 0    | 885   | 255  | 0 | 0 | 0   | 0   | 0.2 | 2.8 |
| <i>Picrasma quassioides</i>                       | F | 0 | 0 | 0    | 0    | 0     | 12   | 0 | 0 | 0   | 0   | 0   | 6.7 |
| <i>Prunus jamasakura</i>                          | F | 0 | 0 | 12   | 12   | 218   | 327  | 0 | 0 | 1.6 | 6.7 | 0.3 | 4.2 |
| <i>Syrax japonica</i>                             | F | 0 | 0 | 0    | 0    | 61    | 291  | 0 | 0 | 0   | 0   | 0.2 | 4.5 |
| <i>Syrax obasica</i>                              | F | 0 | 0 | 0    | 0    | 24    | 12   | 0 | 0 | 0   | 0   | 0.2 | 5.9 |
| <i>Fraxinus longicuspis</i> var. <i>latifolia</i> | W | 0 | 0 | 12   | 12   | 0     | 0    | 0 | 0 | 0.4 | 4.8 | 0   | 0   |
| Total                                             |   | 0 | 0 | 24   | 24   | 1673  | 1212 | 0 | 0 | 1   | 5.7 | 0.2 | 4.5 |
| Lucidophyllous shrub                              |   |   |   |      |      |       |      |   |   |     |     |     |     |
| <i>Camellia sasanqua</i>                          | G | 0 | 0 | 0    | 0    | 12    | 36   | 0 | 0 | 0   | 0   | 0.2 | 2.1 |
| <i>Ardisia crenata</i>                            | F | 0 | 0 | 0    | 0    | 12    | 0    | 0 | 0 | 0   | 0   | 0.1 | 0   |
| <i>Aucuba japonica</i>                            | F | 0 | 0 | 255  | 182  | 97    | 448  | 0 | 0 | 0.4 | 2   | 0.1 | 1.5 |
| <i>Dannacanthus indicus</i>                       | F | 0 | 0 | 0    | 0    | 133   | 12   | 0 | 0 | 0   | 0   | 0.0 | 0.8 |
| <i>Elaeagnus pungens</i>                          | F | 0 | 0 | 0    | 0    | 12    | 12   | 0 | 0 | 0   | 0   | 0.3 | 0.9 |
| <i>Eurya japonica</i>                             | F | 0 | 0 | 170  | 158  | 339   | 3321 | 0 | 0 | 0.3 | 2.4 | 0.1 | 1.5 |
| <i>Fatsia japonica</i>                            | F | 0 | 0 | 36   | 0    | 12    | 0    | 0 | 0 | 0.3 | 0   | 0.1 | 0   |
| <i>Ficus erecta</i>                               | F | 0 | 0 | 873  | 800  | 1636  | 1309 | 0 | 0 | 0.8 | 3.1 | 0.1 | 2.1 |
| <i>Ficus erecta</i> var. <i>sieboldii</i>         | F | 0 | 0 | 61   | 48   | 48    | 48   | 0 | 0 | 0.8 | 3.6 | 0.3 | 1.5 |
| <i>Gardenia jasminoides</i>                       | F | 0 | 0 | 24   | 12   | 12    | 24   | 0 | 0 | 0.4 | 3.1 | 0.2 | 0.8 |
| <i>Lasianthus japonicus</i>                       | F | 0 | 0 | 0    | 0    | 485   | 12   | 0 | 0 | 0   | 0   | 0.2 | 0.8 |
| <i>Ligustrum japonicum</i>                        | F | 0 | 0 | 61   | 61   | 48    | 121  | 0 | 0 | 0.6 | 4.4 | 0.2 | 2.1 |
| <i>Maesa japonica</i>                             | F | 0 | 0 | 0    | 0    | 2291  | 2473 | 0 | 0 | 0   | 0   | 0.2 | 0.8 |
| <i>Myrsine seguinii</i>                           | F | 0 | 0 | 0    | 0    | 0     | 24   | 0 | 0 | 0   | 0   | 0   | 0.8 |
| Total                                             |   | 0 | 0 | 1479 | 1261 | 5139  | 7842 | 0 | 0 | 0.6 | 3   | 0.2 | 1.4 |
| Lucidophyllous tree                               |   |   |   |      |      |       |      |   |   |     |     |     |     |
| <i>Camellia japonica</i>                          | G | 0 | 0 | 255  | 255  | 145   | 352  | 0 | 0 | 0.4 | 3.8 | 0.2 | 2.9 |
| <i>Castanopsis</i> sp.                            | G | 0 | 0 | 994  | 655  | 618   | 473  | 0 | 0 | 0.5 | 8   | 0.1 | 3.2 |
| <i>Distylium racemosum</i>                        | G | 0 | 0 | 12   | 12   | 0     | 0    | 0 | 0 | 0.3 | 0.9 | 0   | 0   |
| <i>Pasania edulis</i>                             | G | 0 | 0 | 0    | 0    | 0     | 12   | 0 | 0 | 0   | 0   | 0   | 6.8 |

|                                    |   |   |   |      |      |       |       |   |   |     |     |     |     |
|------------------------------------|---|---|---|------|------|-------|-------|---|---|-----|-----|-----|-----|
| <i>Quercus glauca</i>              | G | 0 | 0 | 242  | 218  | 121   | 279   | 0 | 0 | 0.5 | 5.7 | 0.2 | 4.2 |
| <i>Quercus salicina</i>            | G | 0 | 0 | 24   | 24   | 0     | 0     | 0 | 0 | 0.3 | 5.3 | 0   | 0   |
| <i>Quercus gihva</i>               | G | 0 | 0 | 36   | 24   | 12    | 36    | 0 | 0 | 0.5 | 4.8 | 0.1 | 2.4 |
| <i>Cinnamomum camphora</i>         | F | 0 | 0 | 0    | 0    | 0     | 279   | 0 | 0 | 0   | 0   | 0   | 2.9 |
| <i>Cinnamomum insularimontanum</i> | F | 0 | 0 | 48   | 48   | 0     | 24    | 0 | 0 | 0.7 | 7.5 | 0   | 1.3 |
| <i>Cleyera japonica</i>            | F | 0 | 0 | 12   | 0    | 0     | 0     | 0 | 0 | 0.3 | 0   | 0   | 0   |
| <i>Daphniphyllum macropodum</i>    | F | 0 | 0 | 0    | 0    | 12    | 0     | 0 | 0 | 0   | 0   | 0.1 | 0   |
| <i>Daphniphyllum teijsmannii</i>   | F | 0 | 0 | 0    | 0    | 12    | 73    | 0 | 0 | 0   | 0   | 0.2 | 2.0 |
| <i>Diospyros morrisiana</i>        | F | 0 | 0 | 85   | 85   | 0     | 109   | 0 | 0 | 1.1 | 8.9 | 0   | 6.2 |
| <i>Elaeocarpus japonicus</i>       | F | 0 | 0 | 0    | 0    | 0     | 12    | 0 | 0 | 0   | 0   | 0   | 7.4 |
| <i>Elaeocarpus sylvestris</i>      | F | 0 | 0 | 0    | 0    | 12    | 24    | 0 | 0 | 0   | 0   | 0.4 | 5.9 |
| <i>Ilex chinensis</i>              | F | 0 | 0 | 12   | 12   | 24    | 36    | 0 | 0 | 0.6 | 6.5 | 0.2 | 2.8 |
| <i>Ilex integra</i>                | F | 0 | 0 | 12   | 0    | 24    | 12    | 0 | 0 | 0.5 | 0   | 0.3 | 7.7 |
| <i>Ilex micrococca</i>             | F | 0 | 0 | 0    | 0    | 0     | 24    | 0 | 0 | 0   | 0   | 0   | 5.7 |
| <i>Ilex rotunda</i>                | F | 0 | 0 | 24   | 24   | 12    | 36    | 0 | 0 | 0.9 | 2.4 | 0.1 | 2.0 |
| <i>Litsea coreana</i>              | F | 0 | 0 | 12   | 12   | 0     | 48    | 0 | 0 | 0.9 | 7.2 | 0   | 1.9 |
| <i>Melia azedarach</i>             | F | 0 | 0 | 0    | 0    | 12    | 0     | 0 | 0 | 0   | 0   | 0.3 | 0   |
| <i>Meliosma rigida</i>             | F | 0 | 0 | 170  | 170  | 109   | 194   | 0 | 0 | 0.8 | 5.8 | 0.1 | 3.5 |
| <i>Neolitsea aciculata</i>         | F | 0 | 0 | 12   | 12   | 24    | 36    | 0 | 0 | 0.4 | 5.1 | 0.1 | 2.0 |
| <i>Neolitsea sericea</i>           | F | 0 | 0 | 12   | 12   | 36    | 0     | 0 | 0 | 0.3 | 3.8 | 0.1 | 0   |
| <i>Persea japonica</i>             | F | 0 | 0 | 145  | 145  | 12    | 36    | 0 | 0 | 0.6 | 6.1 | 0.3 | 3.6 |
| <i>Persea thunbergii</i>           | F | 0 | 0 | 48   | 48   | 764   | 182   | 0 | 0 | 0.7 | 7.5 | 0.2 | 3.4 |
| <i>Prunus spinulosa</i>            | F | 0 | 0 | 12   | 12   | 36    | 24    | 0 | 0 | 0.1 | 1.5 | 0.2 | 2.2 |
| Total                              |   | 0 | 0 | 2170 | 1770 | 1988  | 2303  | 0 | 0 | 0.6 | 6.5 | 0.1 | 3.4 |
| Total                              |   | 0 | 0 | 3830 | 3164 | 41248 | 16121 | 0 | 0 | 0.6 | 4.9 | 0.2 | 2.8 |

<sup>a</sup> F: Frugivore-dispersal, G: Gravity-dispersal, W: Wind-dispersal.
